# Supplementary material for: Prolonged Use of ADHD Medications is Associated with Testosterone Hypofunction – Results from a National Claims Database Analysis
Source: Research Square preprint supplement (doi:10.21203/rs.3.rs-3117834/v1), 2023-07-05

## Cohort 1

## Stimulant Meds

Patients Before Matching **19,498**  
 Patients After Matching **17,217**

## Cohort 2

## No ADHD

Patients Before Matching **2,416,153**  
 Patients After Matching **17,217**

| Demographics |                           | Mean ± SD   | Patients  | % of Cohort | P-Value  | Mean ± SD   | Patients | % of Cohort | P-Value |
|--------------|---------------------------|-------------|-----------|-------------|----------|-------------|----------|-------------|---------|
| Age          | Current Age               | 28.9 ± 6.16 | 17,242    | 100%        | < 0.0001 | 28.9 ± 6.16 | 17,217   | 100%        | 0.1179  |
|              |                           | 31.1 ± 5.87 | 2,334,475 | 100%        |          | 29 ± 6.15   | 17,217   | 100%        |         |
| AI           | Age at Index              | 19.1 ± 8.32 | 17,242    | 100%        | < 0.0001 | 19.1 ± 8.31 | 17,217   | 100%        | 0.0038  |
|              |                           | 22.9 ± 7.06 | 2,334,475 | 100%        |          | 19.4 ± 8.15 | 17,217   | 100%        |         |
| 2106-3       | White                     |             | 13,902    | 80.629%     | < 0.0001 |             | 13,877   | 80.601%     | 0.0405  |
|              |                           |             | 1,174,271 | 50.301%     |          |             | 14,026   | 81.466%     |         |
| 2186-5       | Not Hispanic or Latino    |             | 13,144    | 76.232%     | < 0.0001 |             | 13,119   | 76.198%     | 0.2477  |
|              |                           |             | 1,216,020 | 52.09%      |          |             | 13,210   | 76.726%     |         |
| UN           | Unknown Ethnicity         |             | 3,234     | 18.757%     | < 0.0001 |             | 3,234    | 18.784%     | 0.9560  |
|              |                           |             | 874,065   | 37.442%     |          |             | 3,230    | 18.761%     |         |
| 2131-1       | Unknown Race              |             | 1,999     | 11.594%     | < 0.0001 |             | 1,999    | 11.611%     | 0.1306  |
|              |                           |             | 704,218   | 30.166%     |          |             | 1,910    | 11.094%     |         |
| 2054-5       | Black or African American |             | 1,078     | 6.252%      | < 0.0001 |             | 1,078    | 6.261%      | 0.2608  |
|              |                           |             | 383,141   | 16.412%     |          |             | 1,028    | 5.971%      |         |
| 2135-2       | Hispanic or Latino        |             | 864       | 5.011%      | < 0.0001 |             | 864      | 5.018%      | 0.0278  |
|              |                           |             | 244,390   | 10.469%     |          |             | 777      | 4.513%      |         |
| 2028-9       | Asian                     |             | 187       | 1.085%      | < 0.0001 |             | 187      | 1.086%      | 0.8361  |
|              |                           |             | 55,851    | 2.392%      |          |             | 191      | 1.109%      |         |

## Cohort 1

## Stimulant Meds

Patients Before Matching **19,498**  
 Patients After Matching **17,217**

## Cohort 2

## No ADHD

Patients Before Matching **2,416,153**  
 Patients After Matching **17,217**

| Diagnoses |         |                | Patients      | % of Cohort      | P-Value  | Patients   | % of Cohort      | P-Value  |
|-----------|---------|----------------|---------------|------------------|----------|------------|------------------|----------|
| ICD-10-CM | F91     | Conduct d...   | 997<br>6,279  | 5.782%<br>0.269% | < 0.0001 | 972<br>931 | 5.646%<br>5.407% | 0.3336   |
| ICD-10-CM | E66     | Overweigh...   | 621<br>44,305 | 3.602%<br>1.898% | < 0.0001 | 619<br>698 | 3.595%<br>4.054% | 0.0264   |
| ICD-10-CM | E78     | Disorders ...  | 367<br>22,703 | 2.129%<br>0.973% | < 0.0001 | 367<br>436 | 2.132%<br>2.532% | 0.0137   |
| ICD-10-CM | F84     | Pervasive ...  | 326<br>7,438  | 1.891%<br>0.319% | < 0.0001 | 323<br>450 | 1.876%<br>2.614% | < 0.0001 |
| ICD-10-CM | G47.3   | Sleep apn...   | 288<br>14,113 | 1.67%<br>0.605%  | < 0.0001 | 288<br>352 | 1.673%<br>2.044% | 0.0107   |
| ICD-10-CM | E08-E13 | Diabetes ...   | 124<br>17,649 | 0.719%<br>0.756% | 0.5778   | 124<br>138 | 0.72%<br>0.802%  | 0.3853   |
| ICD-10-CM | F95     | Tic disorder   | 86<br>1,576   | 0.499%<br>0.068% | < 0.0001 | 85<br>108  | 0.494%<br>0.627% | 0.0969   |
| ICD-10-CM | F70-F79 | Intellectua... | 84<br>4,397   | 0.487%<br>0.188% | < 0.0001 | 84<br>114  | 0.488%<br>0.662% | 0.0325   |

Cohort 1

**Stimulant Meds**

Patients Before Matching **19,498**  
 Patients After Matching **17,224**

Cohort 2

**ADHD No Meds**

Patients Before Matching **147,441**  
 Patients After Matching **17,224**

Unnamed Outcome

**Must Have** Testicular hypofunction

1a : Measures of Association

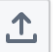

Cohort Statistics

| Cohort           | Patients in Cohort | Patients with Outcome | Risk   |
|------------------|--------------------|-----------------------|--------|
| 1 Stimulant Meds | 17,224             | 206                   | 1.196% |
| 2 ADHD No Meds   | 17,224             | 116                   | 0.673% |

Risk Difference

Risk Ratio

Odds Ratio

| Risk Difference | 95 % CI         | z     | p        | Risk Ratio | 95 % CI       | Odds Ratio | 95 % CI       |
|-----------------|-----------------|-------|----------|------------|---------------|------------|---------------|
| 0.523%          | (0.319%,0.726%) | 5.039 | < 0.0001 | 1.776      | (1.416,2.227) | 1.785      | (1.421,2.244) |

Risk of Outcome

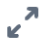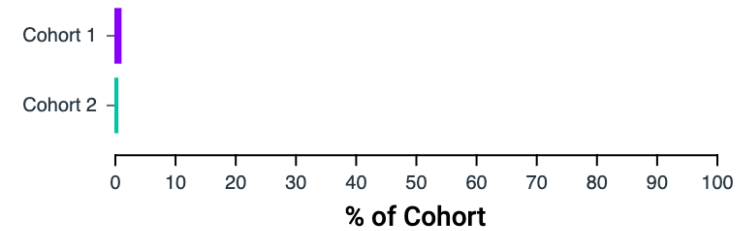

Supplement: Supplementary file 2 [file 8ee322cc17b2b2cffdf2a9ae.pdf]
