# Supplementary material for: Prolonged Use of ADHD Medications is Associated with Testosterone Hypofunction – Results from a National Claims Database Analysis
Source: Research Square preprint supplement (doi:10.21203/rs.3.rs-3117834/v1), 2023-07-05

## Cohort 1

## Stimulant Meds

Patients Before Matching **19,498**  
 Patients After Matching **17,224**

## Cohort 2

## ADHD No Meds

Patients Before Matching **147,441**  
 Patients After Matching **17,224**

|        |                           |                            |                   |                    |          |                           |                  |                    |        |
|--------|---------------------------|----------------------------|-------------------|--------------------|----------|---------------------------|------------------|--------------------|--------|
| Age    | Current Age               | 28.9 ± 6.16<br>27 ± 5.47   | 17,242<br>138,835 | 100%<br>100%       | < 0.0001 | 28.9 ± 6.16<br>29 ± 6.14  | 17,224<br>17,224 | 100%<br>100%       | 0.3491 |
| AI     | Age at Index              | 19.1 ± 8.32<br>17.7 ± 6.84 | 17,242<br>138,835 | 100%<br>100%       | < 0.0001 | 19.1 ± 8.32<br>19.2 ± 8.2 | 17,224<br>17,224 | 100%<br>100%       | 0.1952 |
| 2106-3 | White                     |                            | 13,902<br>90,805  | 80.629%<br>65.405% | < 0.0001 |                           | 13,884<br>13,921 | 80.608%<br>80.823% | 0.6134 |
| 2186-5 | Not Hispanic or Latino    |                            | 13,144<br>89,495  | 76.232%<br>64.461% | < 0.0001 |                           | 13,126<br>13,154 | 76.208%<br>76.37%  | 0.7228 |
| UN     | Unknown Ethnicity         |                            | 3,234<br>38,986   | 18.757%<br>28.081% | < 0.0001 |                           | 3,234<br>3,251   | 18.776%<br>18.875% | 0.8147 |
| 2131-1 | Unknown Race              |                            | 1,999<br>26,325   | 11.594%<br>18.961% | < 0.0001 |                           | 1,999<br>1,962   | 11.606%<br>11.391% | 0.5320 |
| 2054-5 | Black or African American |                            | 1,078<br>19,671   | 6.252%<br>14.169%  | < 0.0001 |                           | 1,078<br>1,074   | 6.259%<br>6.235%   | 0.9290 |
| 2135-2 | Hispanic or Latino        |                            | 864<br>10,354     | 5.011%<br>7.458%   | < 0.0001 |                           | 864<br>819       | 5.016%<br>4.755%   | 0.2607 |
| 2028-9 | Asian                     |                            | 187<br>1,453      | 1.085%<br>1.047%   | 0.6445   |                           | 187<br>206       | 1.086%<br>1.196%   | 0.3351 |

## Cohort 1

## Stimulant Meds

Patients Before Matching **19,498**  
 Patients After Matching **17,224**

## Cohort 2

## ADHD No Meds

Patients Before Matching **147,441**  
 Patients After Matching **17,224**

|           |         |                | Cohort       |                  |          | Cohort     |                  |        |
|-----------|---------|----------------|--------------|------------------|----------|------------|------------------|--------|
| ICD-10-CM | F91     | Conduct d...   | 997<br>3,898 | 5.782%<br>2.808% | < 0.0001 | 980<br>928 | 5.69%<br>5.388%  | 0.2206 |
| ICD-10-CM | E66     | Overweigh...   | 621<br>3,377 | 3.602%<br>2.432% | < 0.0001 | 609<br>527 | 3.536%<br>3.06%  | 0.0134 |
| ICD-10-CM | E78     | Disorders ...  | 367<br>1,660 | 2.129%<br>1.196% | < 0.0001 | 363<br>356 | 2.108%<br>2.067% | 0.7919 |
| ICD-10-CM | F84     | Pervasive ...  | 326<br>2,946 | 1.891%<br>2.122% | 0.0456   | 326<br>320 | 1.893%<br>1.858% | 0.8116 |
| ICD-10-CM | G47.3   | Sleep apn...   | 288<br>1,930 | 1.67%<br>1.39%   | 0.0034   | 287<br>257 | 1.666%<br>1.492% | 0.1948 |
| ICD-10-CM | E08-E13 | Diabetes ...   | 124<br>1,376 | 0.719%<br>0.991% | 0.0006   | 124<br>108 | 0.72%<br>0.627%  | 0.2919 |
| ICD-10-CM | F95     | Tic disorder   | 86<br>786    | 0.499%<br>0.566% | 0.2631   | 86<br>68   | 0.499%<br>0.395% | 0.1460 |
| ICD-10-CM | F70-F79 | Intellectua... | 84<br>1,079  | 0.487%<br>0.777% | < 0.0001 | 84<br>61   | 0.488%<br>0.354% | 0.0556 |

Cohort 1

**Stimulant Meds**

Patients Before Matching **19,498**  
 Patients After Matching **17,224**

Cohort 2

**ADHD No Meds**

Patients Before Matching **147,441**  
 Patients After Matching **17,224**

Unnamed Outcome

**Must Have** Testicular hypofunction

1a : Measures of Association

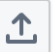

Cohort Statistics

| Cohort           | Patients in Cohort | Patients with Outcome | Risk   |
|------------------|--------------------|-----------------------|--------|
| 1 Stimulant Meds | 17,224             | 206                   | 1.196% |
| 2 ADHD No Meds   | 17,224             | 116                   | 0.673% |

Risk Difference

Risk Ratio

Odds Ratio

| Risk Difference | 95 % CI         | z     | p        | Risk Ratio | 95 % CI       | Odds Ratio | 95 % CI       |
|-----------------|-----------------|-------|----------|------------|---------------|------------|---------------|
| 0.523%          | (0.319%,0.726%) | 5.039 | < 0.0001 | 1.776      | (1.416,2.227) | 1.785      | (1.421,2.244) |

Risk of Outcome

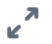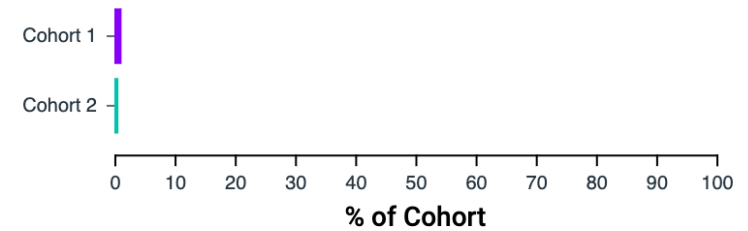

Supplement: Supplementary file 1 [file 105ea37b9d0534e856318cb0.pdf]
