# Supplementary material for: Prolonged Use of ADHD Medications is Associated with Testosterone Hypofunction – Results from a National Claims Database Analysis
Source: Research Square preprint supplement (doi:10.21203/rs.3.rs-3117834/v1), 2023-07-05
Supplement: Supplementary file 1 [file 1ec525dbbfe7c6dbb5608a5f.xlsx]

## Sheet: Sheet1
		Men with ADHD Diagnosis and Long-Term ADHD Medications vs No ADHD Diagnoses or Meds
		Prior to Propensity Match			After Propensity Matching
		Men receiving Chronic ADHD Meds	Men without ADHD	P value	Men receiving Chronic ADHD Meds	Men without ADHD	P value
	Baseline Variables
	Total Patients	14855	199069	---	11407	11407	---
	Age at Index	14.2 ± 7.35	21.7 ± 7.45	<0.0001	14.7 ± 7.36	15.0 ± 7.33	0.009
	Current Age	25.5 ± 5.33	30.7 ± 6.08	<0.0001	25.7 ± 5.45	25.7 ± 5.42	0.9981
	Race/Ethincity
	White	9,610 (78.1%)	118,352 (60.4%)	<0.0001	8,796 (77.1%)	8,881 (77.9%)	0.1779
	Black or African American	884 (7.18%)	33,140 (16.9%)	<0.0001	854 (7.49%)	814 (7.14%)	0.309
	Asian	117 (0.95%)	4,105 (2.1%)	<0.0001	116 (1.02%)	129 (1.13%)	0.4037
	Unknown Race	1,622 (13.2%)	39,252 (20.1%)	<0.0001	1,579 (13.8%)	1,525 (13.4%)	0.2971
	Not Hispanic or Latino	9,555 (77.6%)	124,824 (63.8%)	<0.0001	8,711 (76.4%)	8,810 (77.3%)	0.0901
	Hispanic or Latino	747 (6.1%)	33,085 (16.9%)	<0.0001	741 (6.50%)	670 (5.87%)	0.051
	Unknown Eithnicity	2,004 (16.3%)	37,839 (19.3%)	<0.0001	1,955 (17.1%)	1,918 (16.8%)	0.5141
	Co-morbidities
	Overweight/Obesity	423 (10.7%)	9,412 (4.81%)	<0.0001	366 (3.2%)	373 (3.27%)	0.7935
	Sleep Apnea	220 (1.79%)	4,028 (2.06%)	0.0399	202 (1.77%)	229 (2.01%)	0.1892
	Hyperlipidemia	204 (1.66%)	6,186 (3.16%)	<0.0001	186 (1.63%)	237 (2.08%)	0.0123
	Diabetes Mellitus	104 (0.85%	10,945 (5.59%)	<0.0001	103 (0.90%)	116 (1.02%)	0.3774
	Conduct Disorder	1,320 (10.7%)	1,184 (0.61%)	<0.0001	484 (4.24%)	556 (4.87%)	0.0223
	Pervasive developmental disorder	586 (4.8%)	1,121 (0.57%)	<0.0001	444 (3.89%)	472 (4.14%)	0.345
	Tic Disorder	144 (1.17%)	240 (0.12%)	<0.0001	103 (0.90%)	112 (0.98%)	0.5474
	Intellectual disablities	163 (1.33%)	1,365 (0.70%)	<0.0001	142 (1.25%)	174 (1.53%)	0.699
	Outcomes
	Diagnoses of Testicular Hypofunction after 5 years	88 (0.715%)	1268 (0.648%)		87 (0.76%)	46 (0.40%)
	Risk Ratio (95% Conficence Interval)	1.10 (0.89-1.37)			1.89 (1.32-2.70)
