# Supplementary material for: Prolonged Use of ADHD Medications is Associated with Testosterone Hypofunction – Results from a National Claims Database Analysis
Source: Research Square preprint supplement (doi:10.21203/rs.3.rs-3117834/v1), 2023-07-05
Supplement: Supplementary file 2 [file d97cb37229f6231084c7c1de.xlsx]

## Sheet: Sheet1
		Men with ADHD Diagnosis and Long-Term vs No ADHD Medication Use
		Prior to Propensity Match			After Propensity Matching
		Men receiving Chronic ADHD Meds	Men Not receiving Any ADHD Meds	P value	Men receiving Chronic ADHD Meds	Men Not receiving Any ADHD Meds	P value
	Baseline Variables
	Total Patients	14855	186919	---	12084	12084	---
	Age at Index	14.2 ± 7.35	18.9 ± 7.16	<0.0001	14.3 ± 7.33	14.3 ± 7.27	0.7407
	Current Age	25.5 ± 5.33	27.9 ± 5.7	<0.0001	25.6 ± 5.33	25.6 ± 5.36	0.9298
	Race/Ethincity
	White	9,610 (78.1%)	120,509 (67.9%)	<0.0001	9,392 (77.7%)	9,378 (77.6%)	0.8288
	Black or African American	884 (7.18%)	23,021 (13.0%)	<0.0001	884 (7.32%)	923 (7.64%)	0.3402
	Asian	117 (0.95%)	1,963 (1.1%)	0.1093	117 (0.97%)	135 (1.12%)	0.2543
	Unknown Race	1,622 (13.2%)	31,287 (17.6%)	<0.0001	1,619 (13.4%)	1,609 (13.3%)	0.85
	Not Hispanic or Latino	9,555 (77.6%)	116,202 (65.5%)	<0.0001	9,333 (77.2%)	9,356 (77.4%)	0.7238
	Hispanic or Latino	747 (6.1%)	12,314 (6.9%)	0.0002	747 (6.18%)	721 (5.97%)	0.4838
	Unknown Eithnicity	2,004 (16.3%)	48,945 (27.6%)	<0.0001	2,004 (16.6%)	2,007 (16.6%)	0.9586
	Co-morbidities
	Overweight/Obesity	423 (10.7%)	4,845 (2.73%)	<0.0001	399 (3.3%)	355 (2.94%)	0.1035
	Sleep Apnea	220 (1.79%)	2,418 (1.36%)	<0.0001	212 (1.75%)	207 (1.71%)	0.8054
	Hyperlipidemia	204 (1.66%)	2,627 (1.36%)	0.1164	197 (1.63%)	182 (1.51%)	0.4374
	Diabetes Mellitus	104 (0.85%	1,958 (1.10%)	0.0075	101 (0.84%)	87 (0.72%)	0.3051
	Conduct Disorder	1,320 (10.7%)	3,845 (2.7%)	<0.0001	1,100 (9.10%)	1,095 (9.06%)	0.9109
	Pervasive developmental disorder	586 (4.8%)	3,118 (1.76%)	<0.0001	560 (4.63%)	611 (5.06%)	0.1266
	Tic Disorder	144 (1.17%)	933 (0.53%)	<0.0001	136 (1.13%)	111 (0.92%)	0.1098
	Intellectual disablities	163 (1.33%)	1,204 (0.68%)	<0.0001	158 (1.31%)	136 (1.13%)	0.1967
	Outcomes
	Diagnoses of Testicular Hypofunction after 5 years	88 (0.72%)	984 (0.55%)		88 (0.73%)	44 (0.36%)
	Risk Ratio (95% Conficence Interval)	1.29 (1.04-1.60)			2.00 (1.39-2.97)
